CORRECTION

# Correction: Turing Patterning Using Gene Circuits with Gas-Induced Degradation of Quorum Sensing Molecules

**Bartłomiej Borek, Jeff Hasty, Lev Tsimring**

There is an error in Fig 2 of the published article. Panel (a) was replaced with a copy of Fig 1. The Supporting Information file S1 Equations contains the incorrect set of differential equations.

Please see corrected [Fig 2](#) and [S1 Equations](#) below.

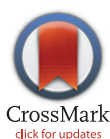

## OPEN ACCESS

**Citation:** Borek B, Hasty J, Tsimring L (2016) Correction: Turing Patterning Using Gene Circuits with Gas-Induced Degradation of Quorum Sensing Molecules. PLoS ONE 11(7): e0160272. doi:10.1371/journal.pone.0160272

**Published:** July 28, 2016

**Copyright:** © 2016 Borek et al. This is an open access article distributed under the terms of the [Creative Commons Attribution License](#), which permits unrestricted use, distribution, and reproduction in any medium, provided the original author and source are credited.

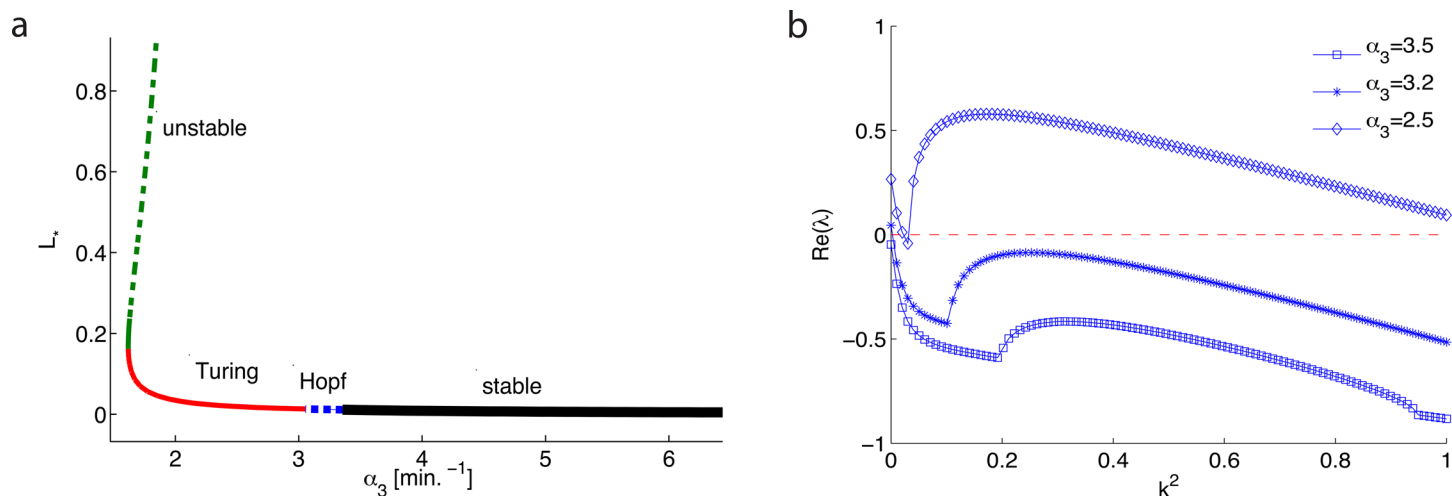

**Fig 2. Slowing AiiA production in Eqs (1)–(4) leads to oscillations and Turing patterns.** (a) A codimension one bifurcation of the AHL fixed point,  $L^*$ , losing stability through a Hopf bifurcation and into a Turing instability as AiiA production rate is decreased. (b) Eigenvalue-wavenumber curves at various AiiA maximal production rates, corroborating the bifurcation analysis results. At the cusp of each curve the eigenvalues become a complex conjugate pair, with each low eigenvalue left off the plot for clarity.

doi:10.1371/journal.pone.0160272.g001

## Supporting Information

**S1 Equations. The model incorporating crosstalk between  $H_2O_2$  and the plux-like promoters.**

(PDF)

## Reference

1. Borek B, Hasty J, Tsimring L (2016) Turing Patterning Using Gene Circuits with Gas-Induced Degradation of Quorum Sensing Molecules. PLoS ONE 11(5): e0153679. doi:[10.1371/journal.pone.0153679](https://doi.org/10.1371/journal.pone.0153679) PMID: [27148743](https://pubmed.ncbi.nlm.nih.gov/27148743/)
